# Supplementary material for: Identification of Spiro-Fused Pyrrolo[3,4-a]pyrrolizines and Tryptanthrines as Potential Antitumor Agents: Synthesis and In Vitro Evaluation
Source: MDPI journal article supplement (doi:10.3390/ijms222111997), 2021-11-05
Supplement: s1 [file s1]

# Identification of Spiro-Fused Pyrrolo[3,4-*a*]pyrrolizines and Tryptanthrines as Potential Antitumor Agents: Synthesis and *in vitro* Evaluation

Diana. K. Latypova <sup>1</sup>, Stanislav V. Shmakov <sup>1</sup>, Sofya A. Pechkovskaya <sup>2</sup>, Alexander S. Filatov <sup>3</sup>, Alexander V. Stepakov <sup>3,4</sup>, Nickolay A. Knyazev <sup>2,5,\*</sup> and Vitali M. Boitsov <sup>1\*</sup>

<sup>1</sup> Saint Petersburg National Research Academic University of the Russian Academy of Sciences, Saint Petersburg, Russia

<sup>2</sup> Institute of Cytology, Russian Academy of Sciences, Saint Petersburg, Russia

<sup>3</sup> Saint Petersburg State University, Saint Petersburg, Russia

<sup>4</sup> Saint Petersburg State Institute of Technology, Saint Petersburg, Russian Federation

<sup>5</sup> Saint-Petersburg Clinical Scientific and Practical Center for Specialized Types of Medical Care (Oncological), Saint-Petersburg, Russia

\* Correspondence: N.A.K.: [nickolayknz@gmail.com](mailto:nickolayknz@gmail.com); V.M.B.: [bovitali@yandex.ru](mailto:bovitali@yandex.ru)

## Table of contents

|    |                                                                                             |     |
|----|---------------------------------------------------------------------------------------------|-----|
| 1. | Plausible reaction mechanism for the formation of compounds <b>4</b> and <b>5</b>           | S2  |
| 2. | Copies of <sup>1</sup> H and <sup>13</sup> C NMR spectra of compounds <b>4</b> and <b>5</b> | S3  |
| 3. | 2D NMR spectra of compound <b>4b</b> and <b>5b</b>                                          | S10 |
| 4. | Bioassay details                                                                            | S11 |

## 1. Plausible reaction mechanism for the formation of compounds 4 and 5

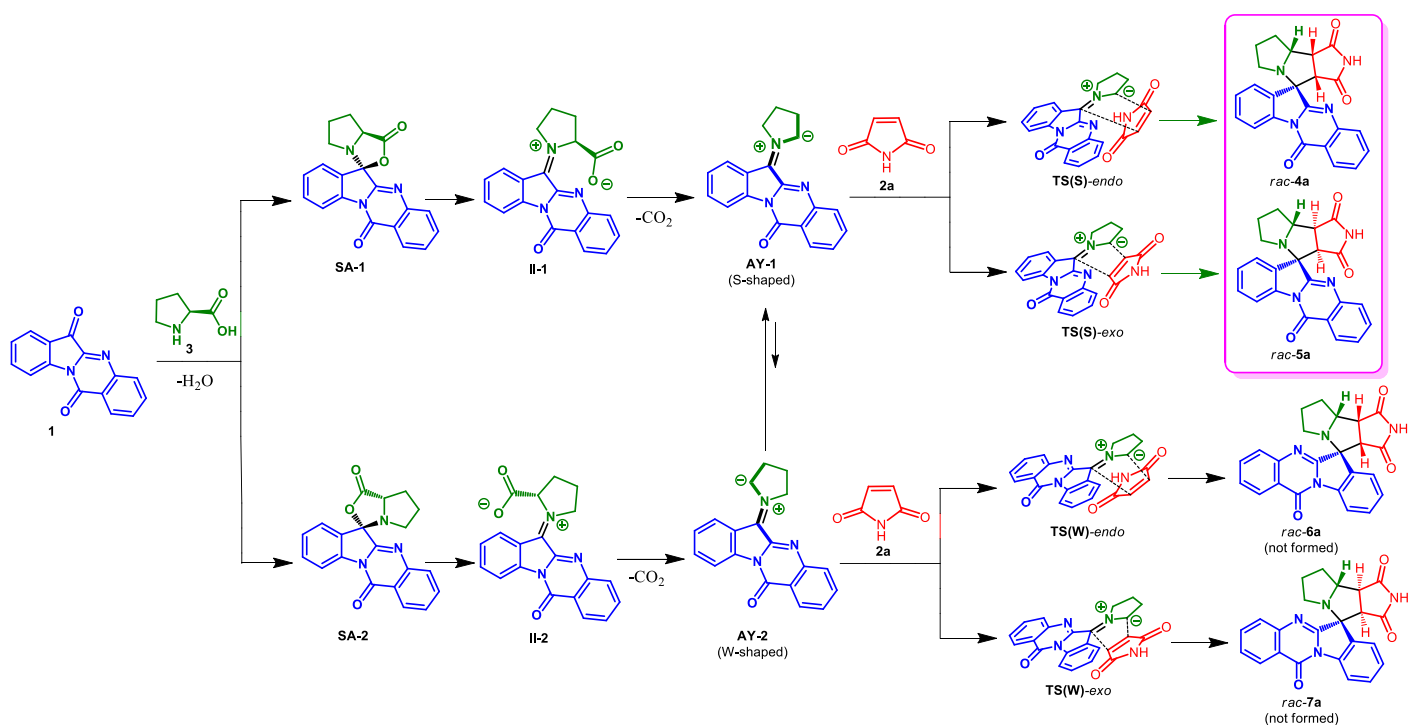

**Scheme S1.** Plausible reaction mechanism for the formation of compounds 4 and 5

*Comment:* In the first stage, spiro-pyrrolooxazoles **SA-1** and **SA-2** are formed from tryptanthrine (**1**) and L-proline (**3**). Further, **SA-1** and **SA-2** through the stage of iminium intermediates **II-1** and **II-2** are converted into *S*- and *W*-shaped azomethine ylides **AY-1** and **AY-2**, respectively. At the last stage, 1,3-dipolar cycloaddition occurs between azomethine ylides and maleimide (**2a**). As a result of this reaction, it is possible to identify only compounds **4a** and **5a** - the products of the interaction of *S*-ylide **AY-1** with maleimide (**2a**).

## 2. Copies of $^1\text{H}$ and $^{13}\text{C}$ NMR spectra of compounds 4 and 5

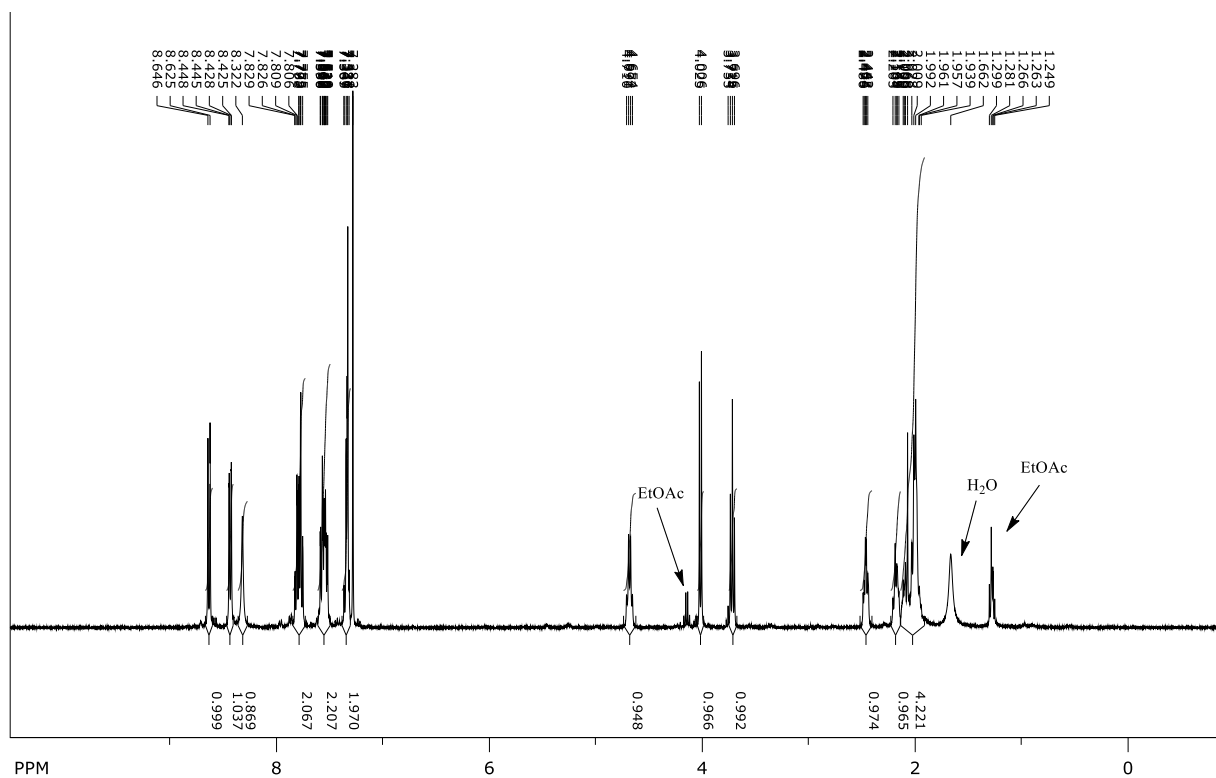

**Figure S1.**  $^1\text{H}$  NMR spectrum of compound **4a** ( $\text{CDCl}_3$ , 400 MHz)

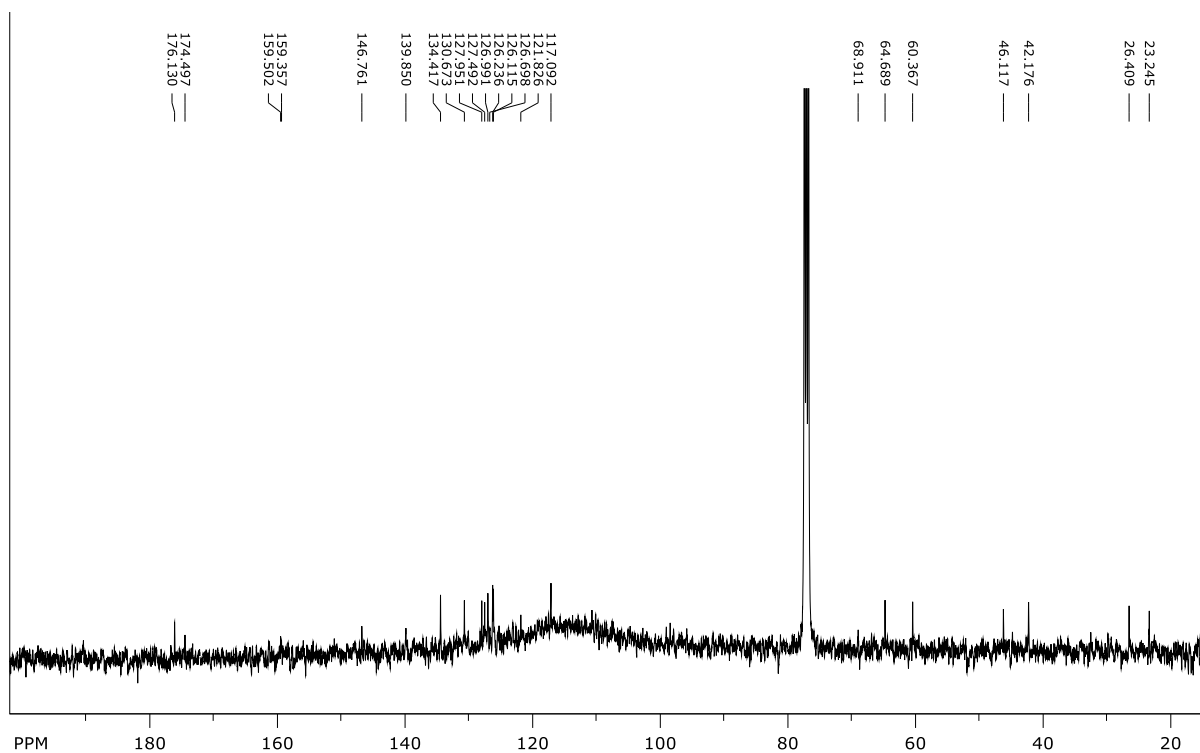

**Figure S2.**  $^{13}\text{C}$  NMR spectrum of compound **4a** ( $\text{CDCl}_3$ , 101 MHz)

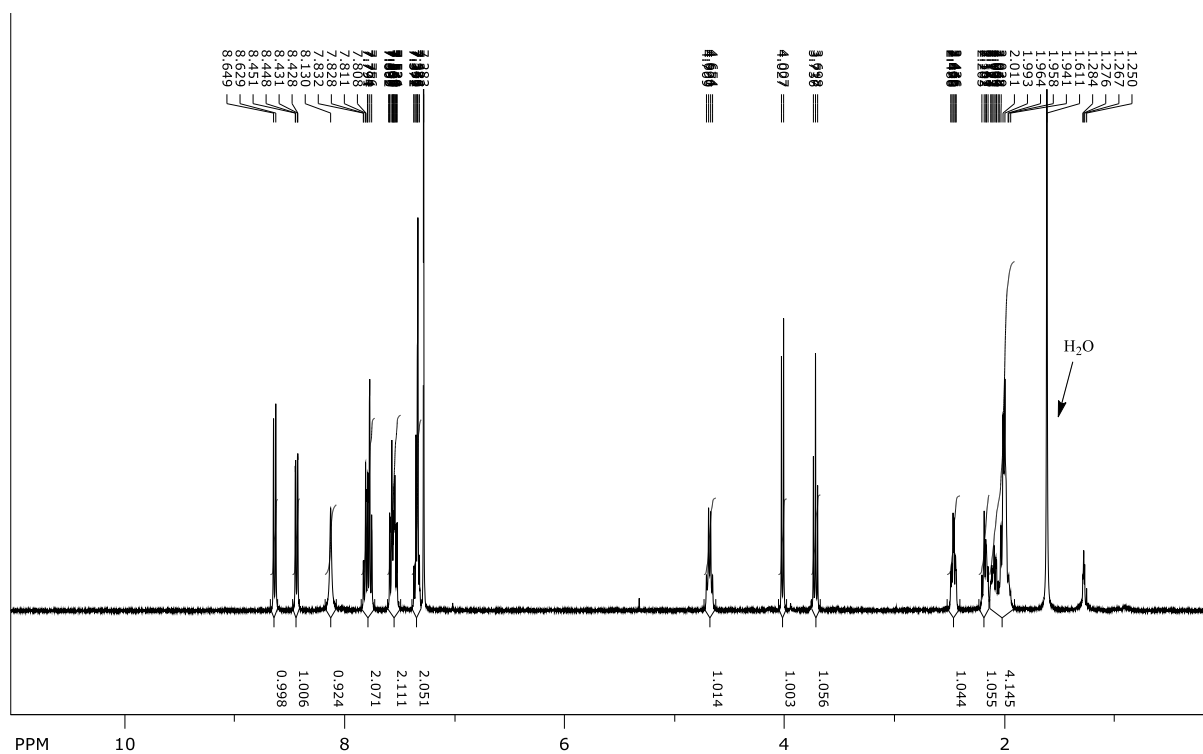

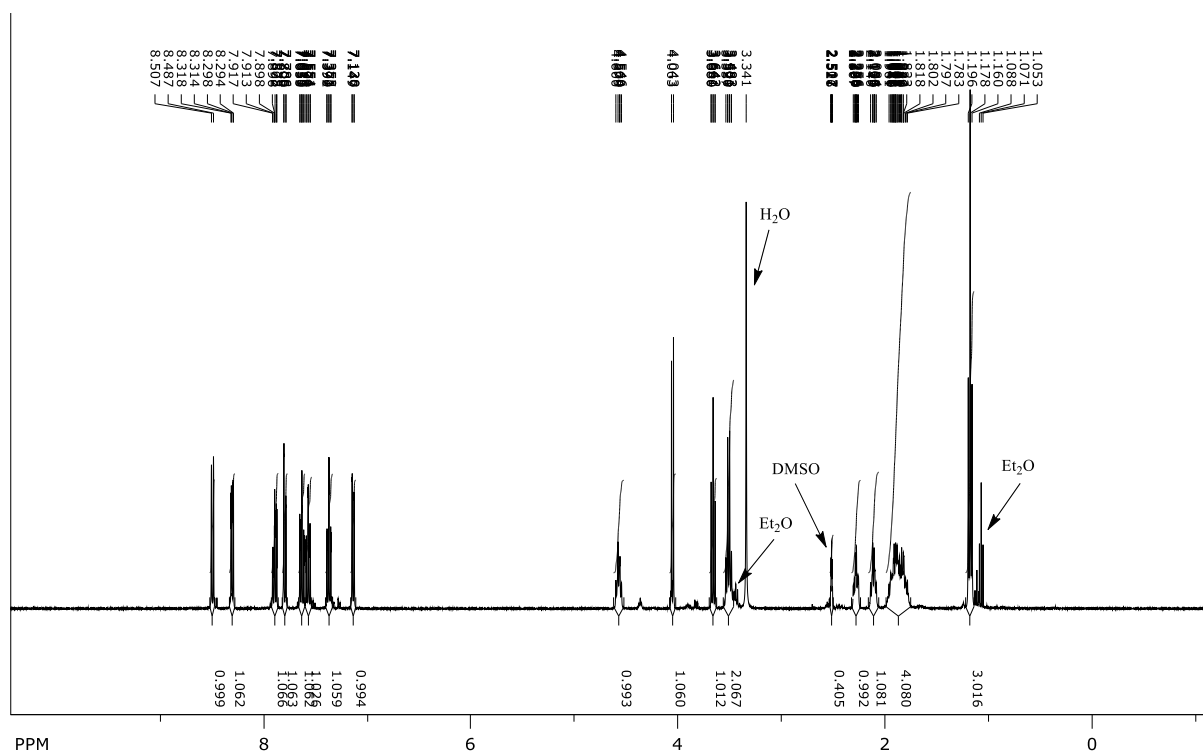

**Figure S5.** <sup>1</sup>H NMR spectrum of compound **4b** (DMSO-*d*<sub>6</sub>, 400 MHz)

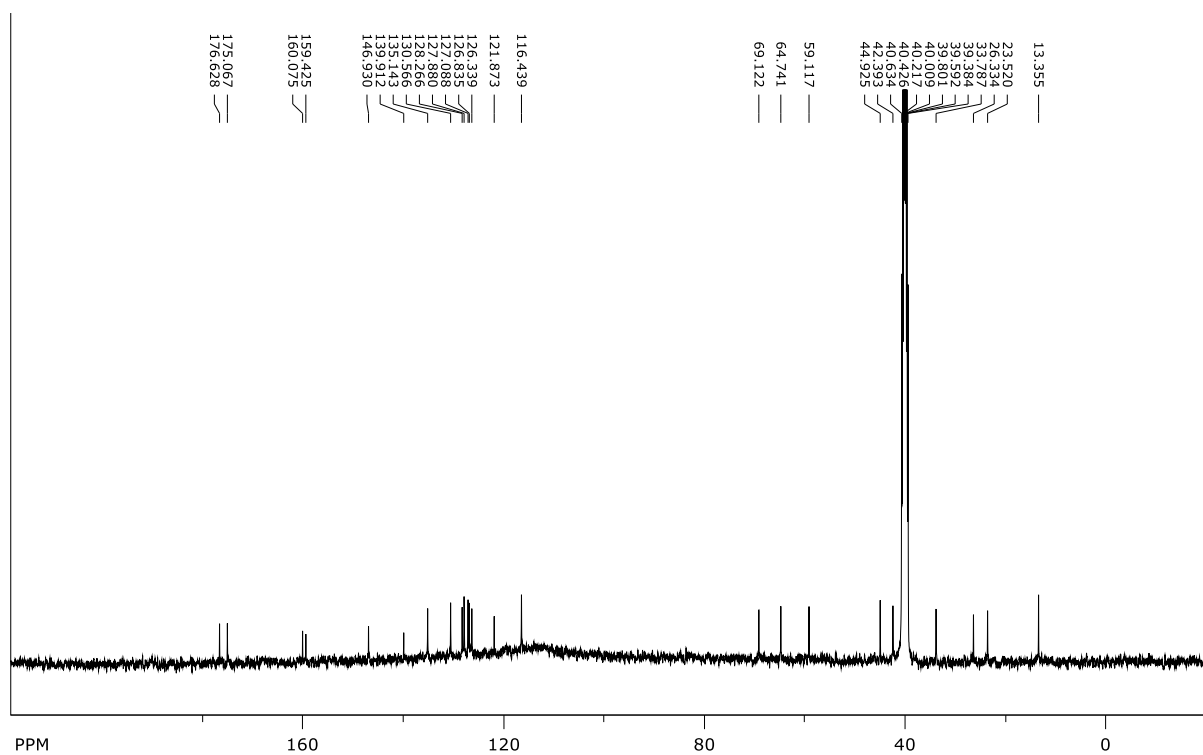

**Figure S6.** <sup>13</sup>C NMR spectrum of compound **4b** (DMSO-*d*<sub>6</sub>, 101 MHz)

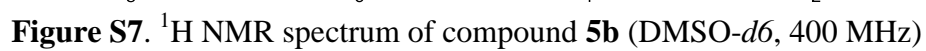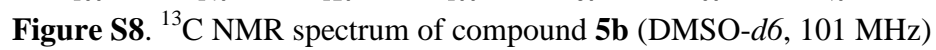

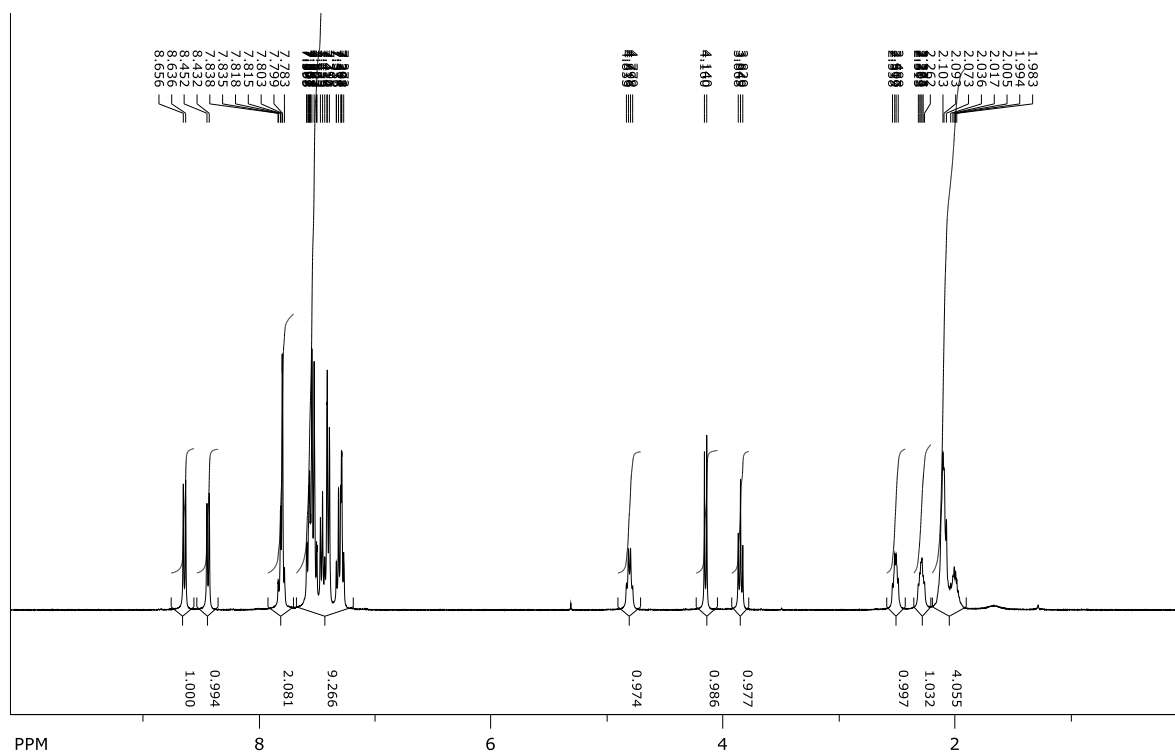

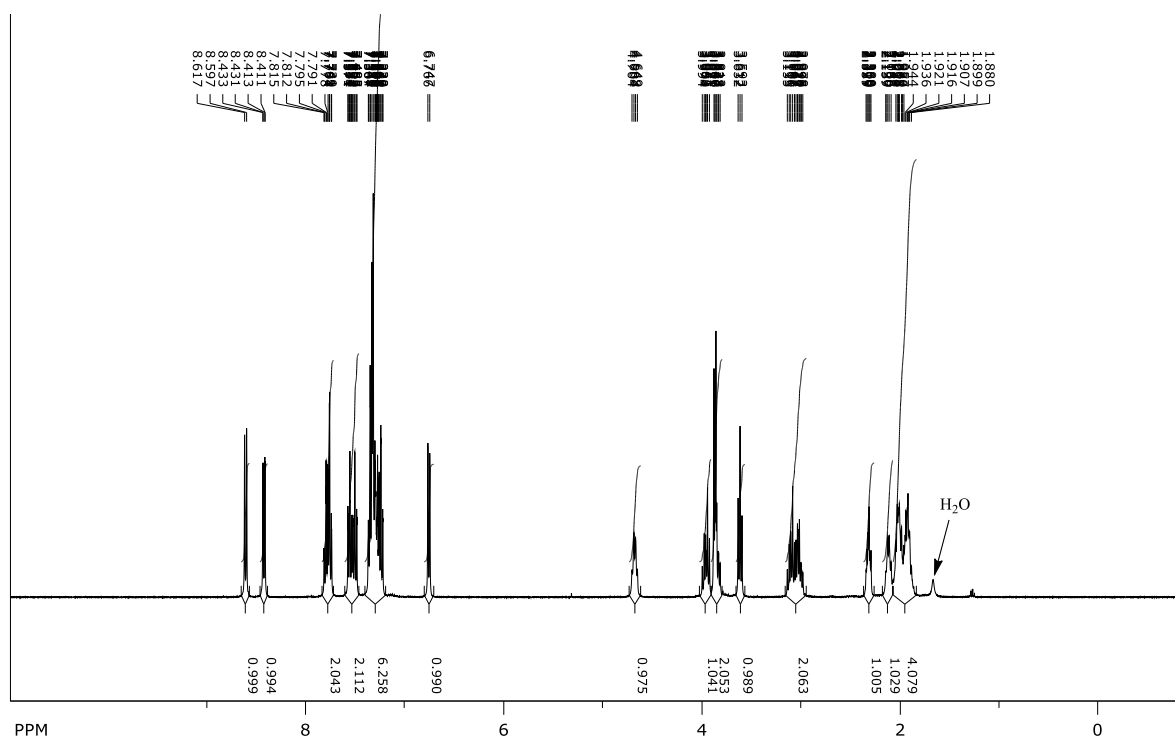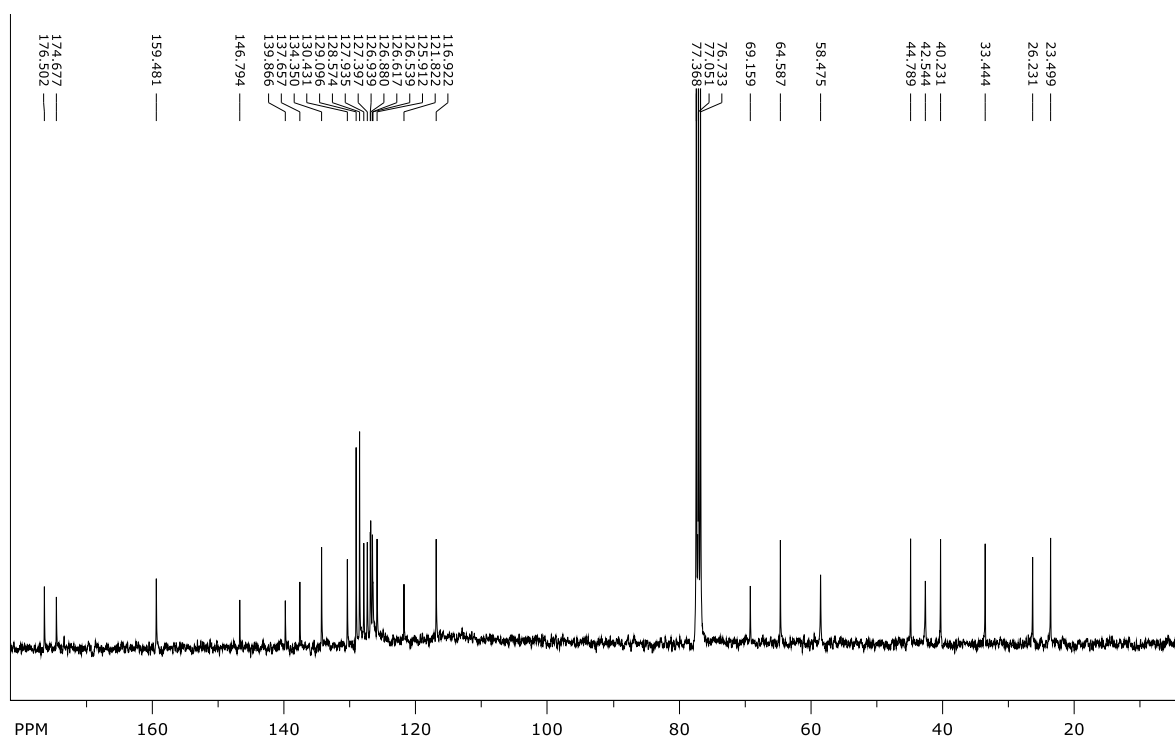



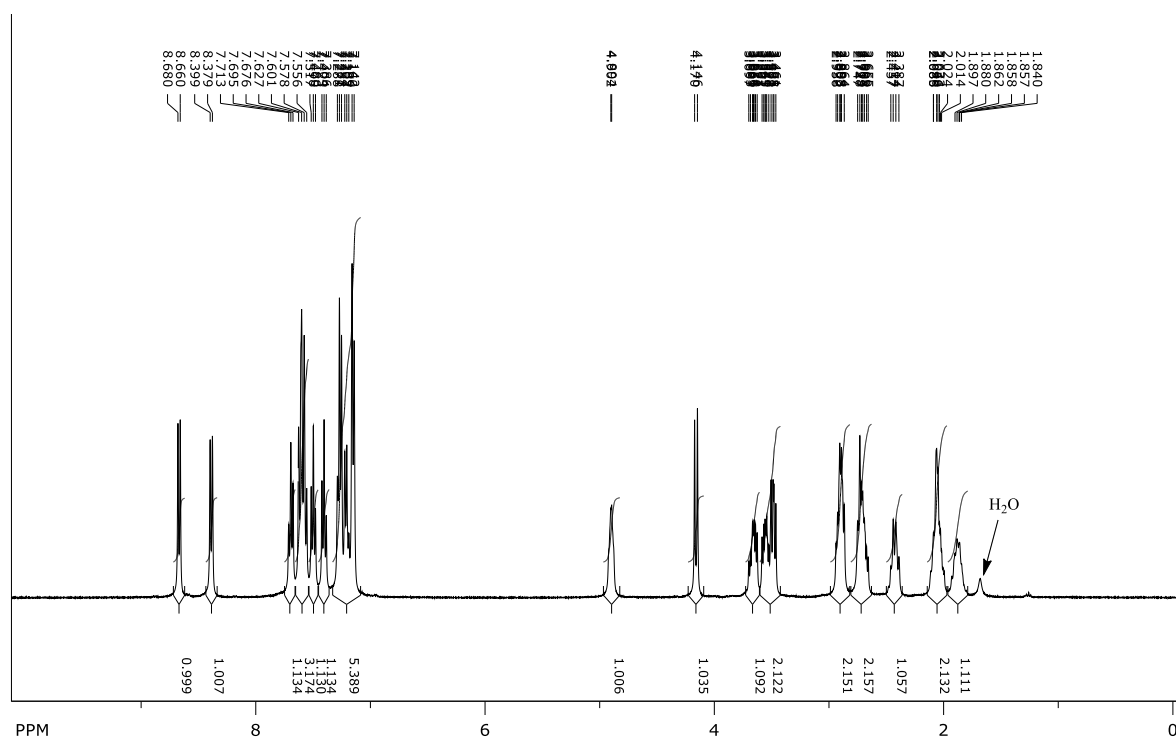

### 3. 2D NMR spectra of compound 4b and 5b

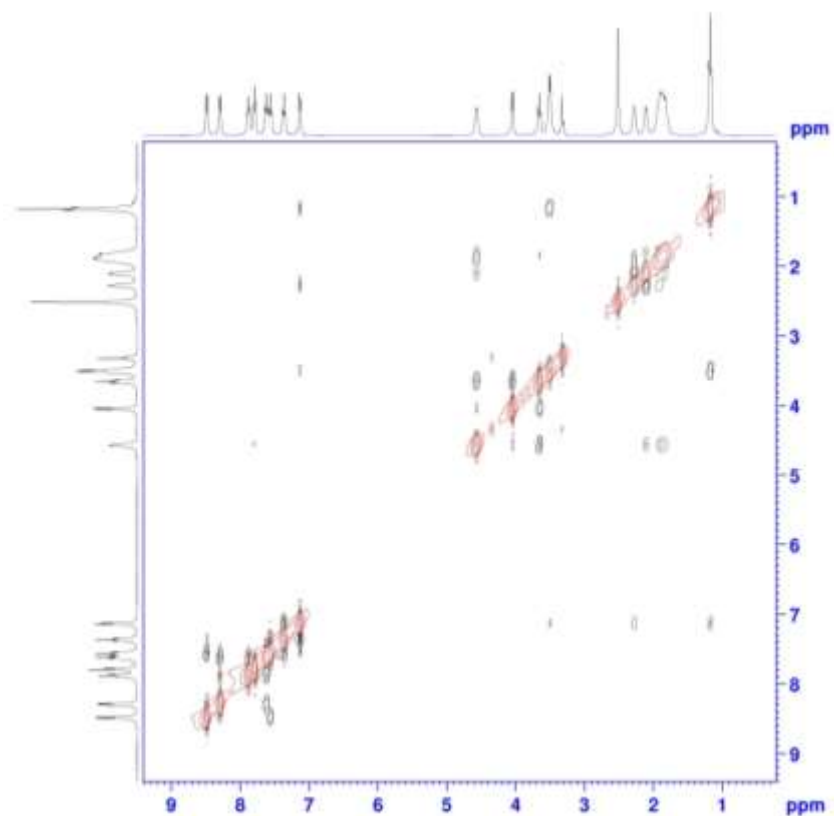

**Figure S15.** NOESY spectrum of compound **4b** (DMSO-*d*<sub>6</sub>, 400 MHz)

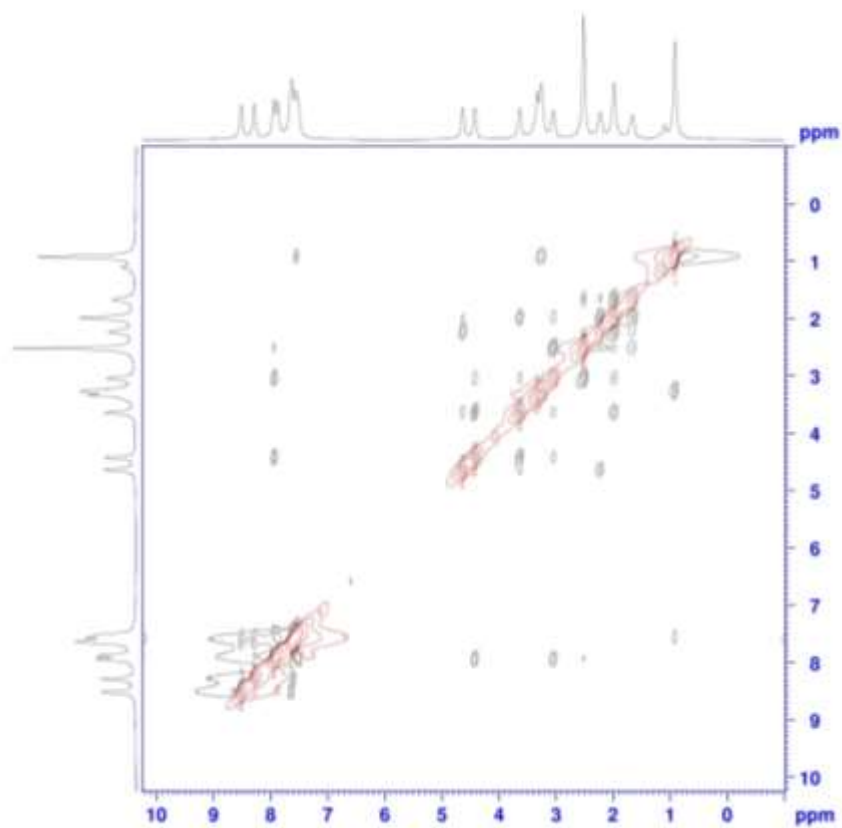

**Figure S16.** NOESY spectrum of compound **5b** (DMSO-*d*<sub>6</sub>, 400 MHz)

## 4. Bioassay details

**Table S1.** K562 cells viability after the treatment for 72 h

| Compound  | Cell viability |           |          |          |          |                   |          |           |
|-----------|----------------|-----------|----------|----------|----------|-------------------|----------|-----------|
|           | 1 µg/ml        | 2 µg/ml   | 5 µg/ml  | 10 µg/ml | 20 µg/ml | 30 µg/ml          | 50 µg/ml | 100 µg/ml |
| <b>4a</b> | 100.4±4.7      | 45.8±3.9  | 43.7±3.1 | 36.7±4.6 | 12.1±2.2 | n.d. <sup>1</sup> | 10.2±1.4 | 12.0±3.4  |
| <b>5a</b> | 101.9±1.6      | 101.0±8.0 | 79.6±2.2 | 62.8±3.7 | 41.4±1.7 | 11.3±1.8          | n.d.     | n.d.      |
| <b>4b</b> | 110.3±1.5      | 96.5±2.6  | 71.3±9.2 | 38±2.1   | 18.1±5.8 | 8.3±1.2           | n.d.     | n.d.      |
| <b>5b</b> | 102.1±4.0      | 94.2±5.5  | 90.3±4.1 | 76.3±7.2 | 66.7±4.6 | n.d.              | 48.8±4.2 | 27.8±4.2  |
| <b>4c</b> | 90.4±0.9       | 82±1.5    | 65.1±3.4 | 57.3±2.6 | 50.8±5.5 | n.d.              | n.d.     | n.d.      |
| <b>5c</b> | 99.6±1.8       | 93.9±4.1  | 81.9±3.8 | 66.2±4.1 | 53.7±3.4 | n.d.              | n.d.     | n.d.      |
| <b>4d</b> | 91.7±4.8       | 79.9±4.2  | 59.6±1.3 | 56.0±2.5 | 50.4±4.3 | n.d.              | 36.8±6.8 | n.d.      |
| <b>5d</b> | 96.5±5.6       | 88.2±4.7  | 69.6±0.6 | 61.5±0.6 | 60.1±5.5 | n.d.              | 58±4.0   | n.d.      |

<sup>1</sup>Not determined.

**Table S2.** HeLa cells viability after the treatment for 72 h

| Compound  | Cell viability |           |           |           |          |                   |          |           |
|-----------|----------------|-----------|-----------|-----------|----------|-------------------|----------|-----------|
|           | 1 µg/ml        | 2 µg/ml   | 5 µg/ml   | 10 µg/ml  | 20 µg/ml | 30 µg/ml          | 50 µg/ml | 100 µg/ml |
| <b>4a</b> | 101.4±2.1      | 101.6±1.9 | 95.2±5.4  | 2.5±0.1   | 3.2±0.1  | n.d. <sup>1</sup> | 1.4±0.3  | 5.6±1.1   |
| <b>5a</b> | 93.4±2.4       | 87.6±2.5  | 91.5±1.6  | 73.5±6.6  | 38.9±5.3 | 2.7±0.2           | n.d.     | n.d.      |
| <b>4b</b> | 92.2±1.4       | 92.9±1.3  | 94.2±3.0  | 90±2.5    | 62.8±5.5 | n.d.              | 33.1±2.3 | 1.1±1     |
| <b>5b</b> | 101.1±0.8      | 102.3±4.1 | 105.1±3.3 | 102.5±5.4 | 89.5±4.9 | n.d.              | 46.9±3.8 | 31.2±3.8  |

<sup>1</sup>Not determined.

**Table S3.** Annexin V-FITC/Propidium iodide (PI) dual staining assay of K562 cells treated with cycloadducts **4a** and **5a** at concentrations 5, 10 and 20 µg/ml using flow cytometry

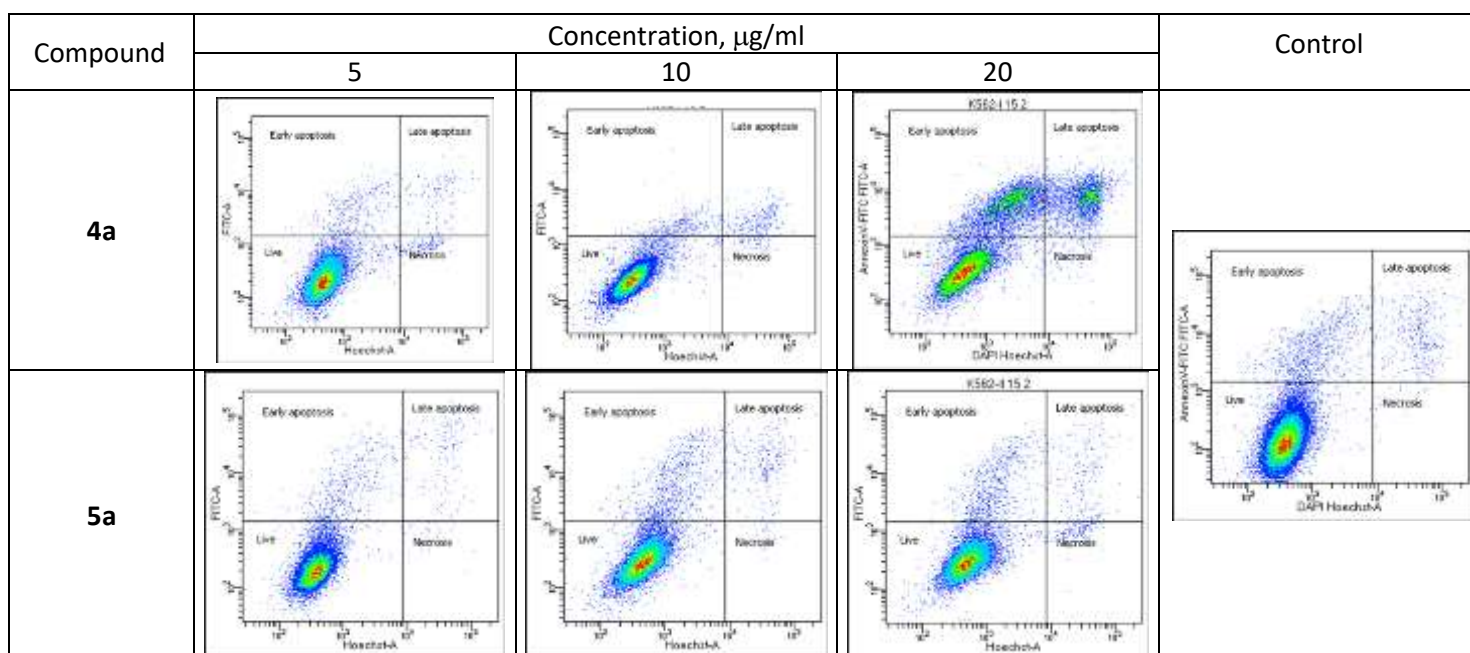

**Table S4.** Annexin V-FITC/Propidium iodide (PI) dual staining assay of HeLa cells treated with cycloadducts **4a** and **5a** at concentrations 5, 10 and 20  $\mu\text{g/ml}$  using flow cytometry

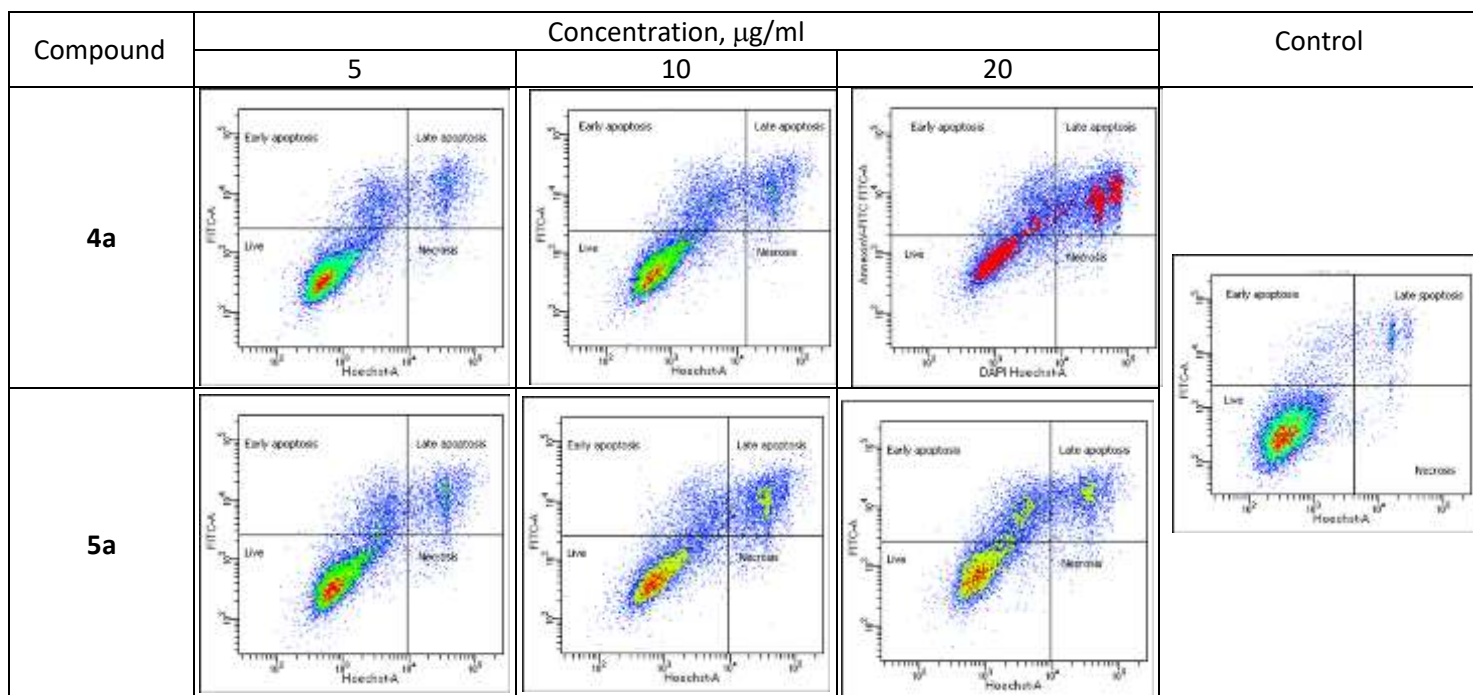

**Table S5.** Effect of compounds **4a** and **5a** at concentrations 5 and 10  $\mu\text{g/ml}$  on the distribution of HeLa cells in the cell cycle after 24h treatment.

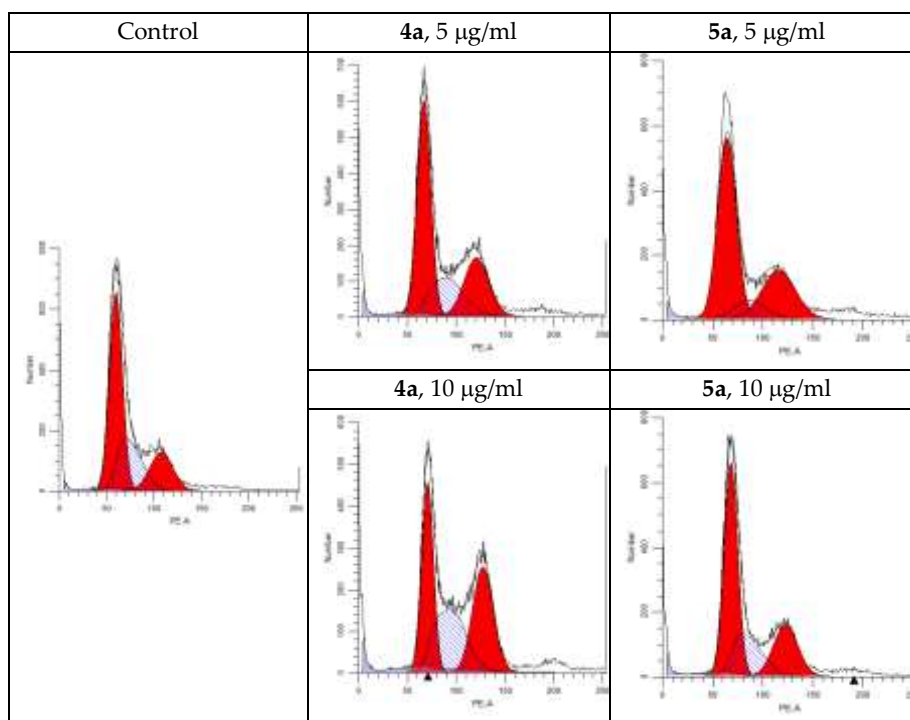

|           | Control    | <b>4a</b> (5 $\mu\text{g/ml}$ ) | <b>4a</b> (10 $\mu\text{g/ml}$ ) | <b>5a</b> (5 $\mu\text{g/ml}$ ) | <b>5a</b> (10 $\mu\text{g/ml}$ ) |
|-----------|------------|---------------------------------|----------------------------------|---------------------------------|----------------------------------|
| SubG1 (%) | 2.41±0.19  | 4.22±0.25                       | 6.07±0.83                        | 1.08±0.12                       | 4.21±0.51                        |
| G0/G1 (%) | 53.03±1.67 | 49.75±1.33                      | 31.82±3.18                       | 59.91±1.45                      | 51.86±2.13                       |
| S (%)     | 26.38±1.05 | 21.73±1.36                      | 30.83±2.79                       | 10.22±0.62                      | 21.59±1.46                       |
| G2/M (%)  | 18.85±0.93 | 24.30±1.25                      | 31.73±3.02                       | 28.79±1.48                      | 22.34±1.67                       |

**Table S6.** Effect of compounds **4a** and **5a** at concentrations 5 and 10  $\mu\text{g/ml}$  on the distribution of K562 cells in the cell cycle after 24h treatment.

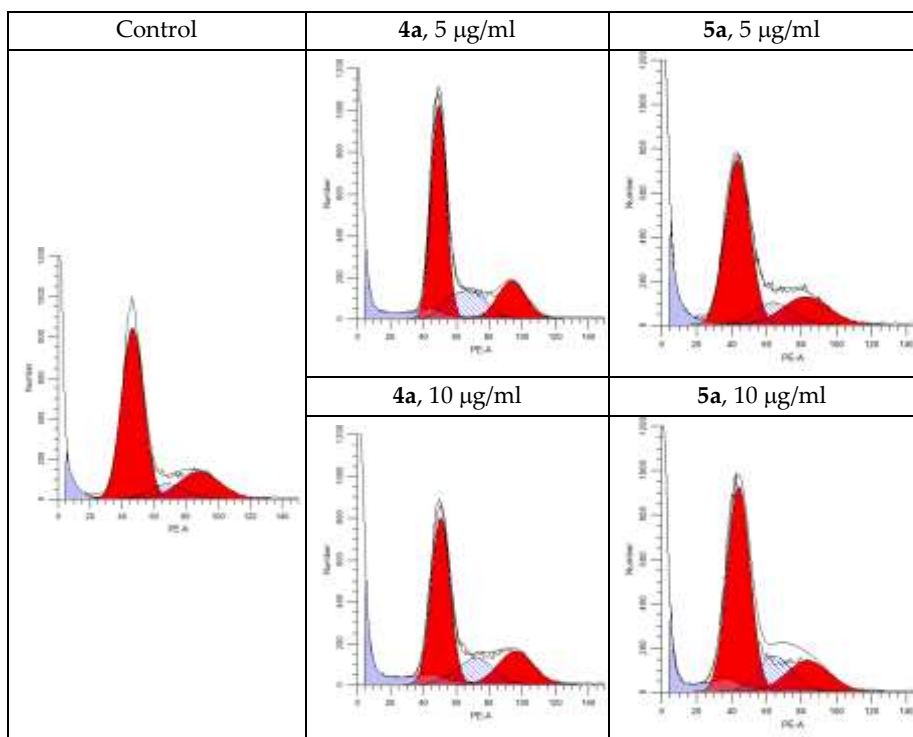

|           | Control          | <b>4a</b> (5 $\mu\text{g/ml}$ ) | <b>4a</b> (10 $\mu\text{g/ml}$ ) | <b>5a</b> (5 $\mu\text{g/ml}$ ) | <b>5a</b> (10 $\mu\text{g/ml}$ ) |
|-----------|------------------|---------------------------------|----------------------------------|---------------------------------|----------------------------------|
| SubG1 (%) | 3.62 $\pm$ 0.23  | 11.32 $\pm$ 0.95                | 14.36 $\pm$ 1.22                 | 9.82 $\pm$ 0.70                 | 10.31 $\pm$ 1.21                 |
| G0/G1 (%) | 67.51 $\pm$ 1.12 | 53.04 $\pm$ 1.01                | 50.62 $\pm$ 1.92                 | 58.91 $\pm$ 1.72                | 57.78 $\pm$ 2.04                 |
| S (%)     | 8.93 $\pm$ 0.74  | 17.91 $\pm$ 1.07                | 15.60 $\pm$ 0.98                 | 12.31 $\pm$ 1.13                | 15.35 $\pm$ 2.99                 |
| G2/M (%)  | 19.94 $\pm$ 1.12 | 17.73 $\pm$ 0.95                | 19.15 $\pm$ 2.25                 | 18.96 $\pm$ 1.52                | 16.56 $\pm$ 2.16                 |

**Table S7.** IC<sub>50</sub> values ( $\mu\text{M}$ ) of screened compounds for K562 and HeLa cell line.

|             | <b>4a</b>      | <b>5a</b>      | <b>4b</b>      | <b>5b</b>       | <b>4c</b> | <b>5c</b> | <b>4d</b>      | <b>5d</b> |
|-------------|----------------|----------------|----------------|-----------------|-----------|-----------|----------------|-----------|
| <b>K562</b> | 4.8 $\pm$ 0.2  | 37.4 $\pm$ 0.5 | 18.3 $\pm$ 0.4 | 110.3 $\pm$ 0.7 | >100      | >100      | 40.8 $\pm$ 0.7 | >100      |
| <b>HeLa</b> | 17.3 $\pm$ 0.4 | 40.7 $\pm$ 0.5 | 69.7 $\pm$ 0.7 | 109.9 $\pm$ 1.1 | –         | –         | –              | –         |

**Table S8.** The values of the signal intensities calculated by processing the images of the obtained Western blots in ImagJ.

|       | <b>4a</b> | <b>5a</b> | Control |
|-------|-----------|-----------|---------|
| GAPDH | 14617     | 13427     | 12034   |
|       | 14342     | 13381     | 11721   |
|       | 14584     | 13042     | 12148   |
| p53   | 12939     | 3826      | 3457    |
|       | 12847     | 3836      | 3244    |
|       | 13445     | 4218      | 3663    |
| MDM2  | 8475      | 11781     | 16474   |
|       | 10399     | 12466     | 17393   |
|       | 7096      | 12518     | 16723   |
